# Supplementary material
Source: Springer Nature journal article supplement (https://www.springerprofessional.de/resource/supplementary/13638_2014_963_MOESM15_ESM.pdf/11898886)

# Average delay

Average delay(sec)

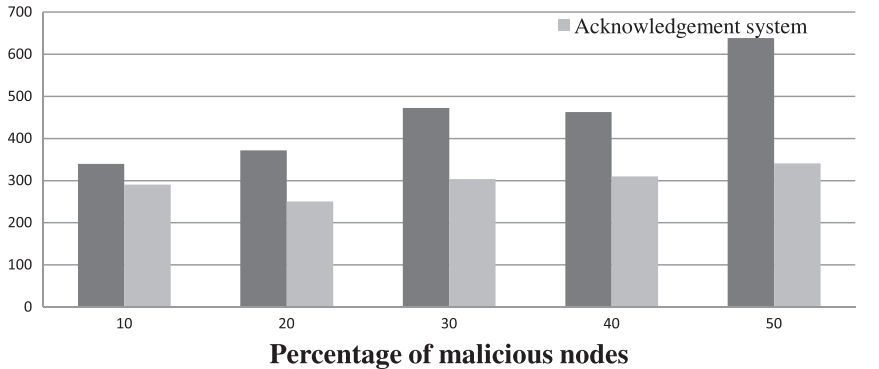

Supplement: MOESM15 [file 11898886]
